# Supplementary material for: Biochemical and Physiological Responses of Cucumis sativus L. to Application of Potential Bioinsecticides—Aqueous Carum carvi L. Seed Distillation By-Product Based Extracts
Source: MDPI journal article supplement (doi:10.3390/agriculture13051019), 2023-05-07
Supplement: s1 [file s1]

**Table S1.** Relative amounts (%) of volatile organic compounds emitted from fresh cucumber leaves sprayed with four caraway extracts (C1-C4) and control treatments: water (C1), glyphosate (C2), and azadirachtin (C3) (based on Table 4)

| VOC | C2      | C3      | E1      | E2      | E3      | E4     | C1      |
|-----|---------|---------|---------|---------|---------|--------|---------|
| 1   | 1.28a   | 0.80a   | 2.22a   | 1.73a   | 2.44a   | 2.31a  | 2.83a   |
| 2   | 55.67a  | 51.18ab | 48.29ab | 47.59ab | 53.09a  | 61.68a | 26.57b  |
| 3   | 17.28a  | 0.00b   | 0.00b   | 0.00b   | 1.14b   | 1.41b  | 0.00b   |
| 4   | 4.56a   | 4.42a   | 4.65a   | 6.35a   | 8.23a   | 10.49a | 5.84a   |
| 5   | 1.28a   | 6.60ab  | 13.61b  | 9.54ab  | 1.41a   | 0.00a  | 3.79ab  |
| 6   | 0.99a   | 0.00b   | 0.00b   | 0.00b   | 0.00b   | 0.00b  | 0.00b   |
| 7   | 1.81a   | 4.05ab  | 24.09c  | 25.07c  | 25.02.c | 18.84c | 10.72b  |
| 8   | 0.00a   | 3.34ab  | 0.00a   | 0.00a   | 0.00a   | 0.00a  | 7.34b   |
| 9   | 0.76a   | 4.47b   | 0.00a   | 0.00a   | 0.00a   | 0.00a  | 0.00a   |
| 10  | 1.84abc | 2.01ab  | 1.18bc  | 1.48abc | 1.58abc | 0.81c  | 2.42a   |
| 11  | 0.82a   | 0.86ab  | 1.75cd  | 2.43c   | 1.69cd  | 1.61bd | 1.85cd  |
| 12  | 0.38a   | 0.91b   | 0.00c   | 0.00c   | 0.00c   | 0.00c  | 0.00c   |
| 13  | 1.78a   | 0.00b   | 0.00b   | 0.00b   | 0.00b   | 0.00b  | 0.00b   |
| 14  | 0.40a   | 1.90b   | 0.00a   | 0.59a   | 0.00a   | 0.39a  | 0.66ab  |
| 15  | 0.40a   | 0.34a   | 0.00a   | 0.00a   | 0.37a   | 0.00a  | 0.21a   |
| 16  | 0.00a   | 1.04b   | 0.00a   | 0.75bc  | 0.31ac  | 0.18ac | 0.57abc |
| 17  | 0.00a   | 11.4b   | 0.00a   | 0.00a   | 0.00a   | 0.00a  | 16.14b  |
| 18  | 0.00a   | 0.00a   | 0.00a   | 0.00a   | 0.00a   | 0.00a  | 0.66a   |
| 19  | 0.00a   | 0.11a   | 0.00a   | 0.00a   | 0.00a   | 0.00a  | 0.62b   |
| 20  | 0.57a   | 3.64a   | 0.87a   | 1.03a   | 1.28a   | 0.00a  | 16.76b  |
| 21  | 0.45a   | 1.46b   | 0.00c   | 0.00c   | 0.00c   | 0.00c  | 0.00c   |
| 22  | 1.92a   | 0.56a   | 0.94b   | 1.85b   | 1.26ab  | 0.62b  | 0.75ab  |
| 23  | 3.41a   | 0.43b   | 2.40ab  | 1.59ab  | 1.62ab  | 1.66ab | 1.88ab  |
| 24  | 1.41a   | 0.49b   | 0.00b   | 0.00b   | 0.00b   | 0.00b  | 0.39b   |
| 25  | 2.95a   | 0.00b   | 0.00b   | 0.00b   | 0.00b   | 0.00b  | 0.00b   |

Means in rows indicated with the same letter do not differ according to Tuckey test ( $p > 0.05$ )

**Table S2.** Effect of four caraway extracts (C1 – C4) and water (C1), glyphosate (C2), and azadirachtin application on cucumber photosynthetic apparatus characterizing functional parameters ten days after treatment.

| Parameter                      | C2       | C3        | E1        | E2        | E3        | E4        | C1        |
|--------------------------------|----------|-----------|-----------|-----------|-----------|-----------|-----------|
| F <sub>0</sub>                 | 3951a    | 14854b    | 14458b    | 13954b    | 15083b    | 15231b    | 13417b    |
| F <sub>v</sub>                 | -145a    | 40390b    | 45699b    | 43021b    | 44380b    | 44944b    | 41797b    |
| F <sub>M</sub>                 | 3807a    | 55243b    | 60157b    | 56975b    | 59463b    | 60175b    | 55215b    |
| QY                             | 0.01a    | 0.84b     | 0.84b     | 0.83b     | 0.83b     | 0.84b     | 0.84b     |
| F <sub>m</sub> /F <sub>0</sub> | 0.65a    | 3.75b     | 4.17c     | 4.08bc    | 3.96bc    | 3.95bc    | 4.12bc    |
| F <sub>v</sub> /F <sub>0</sub> | -0.03a   | 2.75b     | 3.17c     | 3.08bc    | 2.96bc    | 2.95bc    | 3.12bc    |
| F <sub>v</sub> /F <sub>M</sub> | -0.04a   | 0.73b     | 0.76c     | 0.75bc    | 0.75bc    | 0.75bc    | 0.76bc    |
| M <sub>0</sub>                 | -0.05a   | 1.30b     | 1.17b     | 1.20b     | 1.23c     | 1.27b     | 1.16b     |
| Area                           | 398110a  | 19169094b | 27455785b | 25939221b | 30697432c | 27987624b | 27834149b |
|                                |          |           | c         | c         |           | c         | c         |
| Ψ <sub>0</sub>                 | 0.94a    | 0.37b     | 0.45b     | 0.44b     | 0.45b     | 0.41b     | 0.44b     |
| ΦE <sub>0</sub>                | -0.03a   | 0.27b     | 0.34c     | 0.33bc    | 0.33bc    | 0.31bc    | 0.33bc    |
| ΦD <sub>0</sub>                | 0.27a    | 0.27b     | 0.24c     | 0.24bc    | 0.25bc    | 0.25bc    | 0.24bc    |
| ΦP <sub>0</sub>                | 1009.60a | 960.80b   | 969.70b   | 967.70b   | 970.50b   | 969.10b   | 968.30b   |
| PI <sub>ABS</sub>              | 0.00a    | 0.61b     | 0.94b     | 0.88b     | 0.82b     | 0.72b     | 0.91b     |
| ABS/RC                         | 17.57a   | 2.82a     | 2.80a     | 2.87a     | 2.98a     | 2.88a     | 2.73a     |
| TR <sub>0</sub> /RC            | -0.79a   | 2.05b     | 2.13b     | 2.16b     | 2.22b     | 2.15b     | 2.07b     |
| ET <sub>0</sub> /RC            | -0.74a   | 0.76a     | 0.96a     | 0.96a     | 0.99a     | 0.88a     | 0.91a     |
| DI <sub>0</sub> /RC            | 18.36a   | 0.76a     | 0.67a     | 0.70a     | 0.76a     | 0.73a     | 0.66a     |
